# Supplementary material for: Simultaneous Chemical and Sensory Analysis of Domestic Cat Urine and Feces With Headspace Solid-Phase Microextraction and GC-MS-Olfactometry
Source: Preprints.org preprint supplement (doi:10.20944/preprints202101.0010.v1), 2021-01-04
Supplement: Supplementary file 1 [file supplementary]

## Supplementary Material

# Simultaneous chemical and sensory analysis of domestic cat urine and feces with headspace solid-phase microextraction and GC-MS-olfactometry

Chumki Banik <sup>1</sup>, Jacek A. Koziel <sup>1\*</sup>, and James Li <sup>2</sup>

<sup>1</sup> Department of Agriculture and Biosystem Engineering, Iowa State University, 4350 Elings Hall, Ames, IA 50011, USA; [cbanik@iastate.edu](mailto:cbanik@iastate.edu) (C.B.); [koziel@iastate.edu](mailto:koziel@iastate.edu) (J.K.)

<sup>2</sup> Nestle Purina, 1 CheckerBoard Sq. St. Louis, MO 63164, USA; [James.li2@rd.nestle.com](mailto:James.li2@rd.nestle.com) (J.L.)

\* Correspondence: [koziel@iastate.edu](mailto:koziel@iastate.edu); Tel.: +1-515-294-4206

**Table S1:** Aroma description as recorded by the panelist for fresh cat urine 10 min extraction

| Retention time | Description      | Event width (min) | Intensity |
|----------------|------------------|-------------------|-----------|
| 2.67           | Unknown          | 0.11              | 6         |
| 4.63           | Unknown          | 0.09              | 10        |
| 10.27          | Unknown          | 0.07              | 15        |
| 15             | Herbaceous, mint | 0.1               | 25        |
| 16.26          | Rain, dirt       | 0.25              | 20        |
| 17.57          | Alcohol          | 0.08              | 11        |
| 17.82          | Mint             | 0.1               | 20        |
| 21.3           | Unknown          | 0.06              | 6         |
| 24.88          | unknown          | 0.08              | 11        |
| 25.07          | Unpleasant 1     | 0.38              | 15        |
| 27.44          | Unknown          | 0.06              | 11        |
| 28.21          | Unknown          | 0.07              | 10        |
| 28.47          | Unpleasant       | 0.1               | 15        |

**Table S2:** Aroma description as recorded by the panelist for fresh cat urine 50 min extraction

| Retention time | Description          | Event width (min) | Intensity |
|----------------|----------------------|-------------------|-----------|
| 2.70           | urinous, unpleasant2 | 0.50              | 50        |
| 3.37           | unknown              | 0.26              | 16        |
| 4.62           | sweet                | 0.18              | 20        |
| 8.1            | unknown              | 0.03              | 6         |
| 8.99           | Unknown              | 0.08              | 10        |
| 10.26          | Sweet                | 0.07              | 10        |
| 11.18          | Unknown              | 0.07              | 10        |
| 11.44          | Unknown              | 0.3               | 21        |
| 12.40          | Unknown              | 0.12              | 12        |

|       |                                   |      |    |
|-------|-----------------------------------|------|----|
| 12.55 | Basmati rice                      | 0.4  | 41 |
| 13.00 | Mint                              | 0.1  | 15 |
| 13.13 | Dirt, rain                        | 0.34 | 30 |
| 14.45 | Woody                             | 0.13 | 21 |
| 14.92 | Mint, herbaceous                  | 0.47 | 35 |
| 16.14 | Rain, cardboard, unpleasant, wild | 0.64 | 40 |
| 16.92 | Nutty, neutral                    | 0.37 | 21 |
| 17.79 | Unknown                           | 0.02 | 11 |
| 17.88 | Burnt                             | 0.13 | 21 |
| 18.37 | Plastic, neutral                  | 0.22 | 20 |
| 19.30 | Unknown                           | 0.06 | 5  |
| 20.91 | Unknown                           | 0.1  | 6  |
| 23.47 | Unknown                           | 0.05 | 6  |
| 24.58 | unknown                           | 0.09 | 15 |
| 24.71 | Unpleasant                        | 0.98 | 40 |
| 27.45 | Unknown                           | 0.79 | 15 |
| 28.75 | Animal                            | 0.36 | 26 |

**Table S3:** Aroma description as recorded by the panelist for stale cat urine 50 minutes extraction

| Retention time | Description                            | Event width (min) | Intensity |
|----------------|----------------------------------------|-------------------|-----------|
| 2.56           | Foul, fishy                            | 0.37              | 30        |
| 3.06           | Sweet                                  | 0.19              | 20        |
| 3.39           | Unknown                                | 0.05              | 16        |
| 4.55           | Chemical                               | 0.22              | 35        |
| 4.81           | Chemical                               | 0.18              | 16        |
| 5.32           | Grassy                                 | 0.17              | 21        |
| 8.05           | Acidic                                 | 0.2               | 20        |
| 8.35           | Vinegar, Burnt                         | 0.51              | 20        |
| 9.09           | Foul, burnt                            | 0.57              | 24        |
| 11.13          | Neutral                                | 0.17              | 21        |
| 11.40          | Chemical, unpleasant 2                 | 0.68              | 35        |
| 12.10          | Basmati rice, nutty                    | 0.87              | 50        |
| 12.98          | Mint                                   | 0.12              | 40        |
| 13.12          | Grassy, wild                           | 0.32              | 45        |
| 13.82          | Medicinal, butter, mint                | 0.84              | 51        |
| 14.94          | Mint                                   | 0.32              | 50        |
| 16.13          | Sweaty                                 | 0.36              | 41        |
| 16.6           | Herbaceous                             | 0.23              | 46        |
| 16.89          | Sour, pleasant1, fruity, burnt, fruity | 0.62              | 45        |
| 17.85          | Burnt, smokey                          | 0.38              | 45        |
| 18.69          | Plastic                                | 0.29              | 25        |
| 20.75          | Smokey, neutral, butter                | 0.45              | 16        |
| 23.36          | Smokey                                 | 0.19              | 11        |
| 24.32          | Foul, animal, urinous, unpleasant 3    | 1.56              | 75        |
| 26.15          | Foul, unpleasant 3, urinous            | 1.55              | 75        |

|       |                                              |      |    |
|-------|----------------------------------------------|------|----|
| 28.27 | Foul, acidic, medicinal, burnt, unpleasant 2 | 2.07 | 50 |
| 31.14 | Smokey, acidic, burnt                        | 1.02 | 30 |
| 34.38 | Animal, ruinous, smokey                      | 1.28 | 30 |

**Table S4:** Aroma description as recorded by the panelist for fresh feces 50 min extraction

| Retention time | Description                               | Event width (min) | Intensity |
|----------------|-------------------------------------------|-------------------|-----------|
| 2.45           | Foul                                      | 0.12              | 16        |
| 2.63           | foul                                      | 0.23              | 20        |
| 3.31           | Chemical, sweet, alcohol, chlorine        | 0.26              | 40        |
| 3.73           | Chemical, alcohol                         | 0.38              | 30        |
| 4.50           | butter                                    | 0.33              | 40        |
| 5.44           | unknown                                   | 0.18              | 21        |
| 6.27           | Herbaceous                                | 0.21              | 30        |
| 6.92           | Mint                                      | 0.11              | 31        |
| 7.66           | unknown                                   | 0.11              | 21        |
| 8.53           | Foul                                      | 0.17              | 31        |
| 8.8            | floral                                    | 0.07              | 21        |
| 10.36          | Chemical, sweet                           | 0.08              | 20        |
| 11.32          | Chemical, medicinal                       | 0.28              | 40        |
| 12.05          | Floral, banana                            | 0.32              | 41        |
| 12.58          | Earthy, basmati rice, sour, nutty         | 0.26              | 45        |
| 13.09          | Rain, grassy, neutral                     | 0.26              | 30        |
| 13.38          | Burnt                                     | 0.35              | 30        |
| 13.76          | Unpleasant1, old cheese                   | 0.55              | 40        |
| 14.33          | Butter                                    | 0.57              | 45        |
| 14.99          | medicinal                                 | 0.23              | 30        |
| 15.91          | Medicinal, popcorn, dirt, butter, popcorn | 0.80              | 50        |
| 16.92          | Sweet, fruity                             | 0.42              | 40        |
| 17.82          | Smokey, body odor                         | 0.66              | 41        |
| 19.27          | Butter, basmati rice, butter              | 0.86              | 60        |
| 20.61          | Woody, wild                               | 0.72              | 50        |
| 21.9           | neutral                                   | 0.25              | 15        |
| 22.54          | medicinal                                 | 0.11              | 15        |
| 24.14          | Foul, urinous, animal                     | 1.41              | 90        |
| 26.05          | Medicinal, unpleasant1                    | 0.87              | 40        |
| 27.54          | Medicinal, unpleasant, foul               | 1.14              | 60        |
| 28.92          | animal                                    | 0.52              | 50        |
| 30.63          | Urinous, animal                           | 0.81              | 51        |
| 33.67          | Plastic, Burnt                            | 1.21              | 30        |
| 34.92          | floral                                    | 0.77              | 20        |

**Table S5:** Aroma description as recorded by the panelist for stale feces 15 min eqm, 50 min extraction

| Retention time | Description                  | Event width (min) | Intensity |
|----------------|------------------------------|-------------------|-----------|
| 1.26           | Sweet                        | 0.27              | 15        |
| 2.7            | Unpleasant, fishy            | 0.72              | 40        |
| 3.66           | unpleasant                   | 0.42              | 16        |
| 4.57           | Sweet, nutty                 | 0.25              | 30        |
| 5.81           | burnt                        | 0.41              | 40        |
| 6.4            | Unpleasant                   | 0.24              | 15        |
| 7.46           | Burnt                        | 0.17              | 20        |
| 7.79           | Unpleasant, burnt plastic    | 0.48              | 35        |
| 8.67           | Burnt, smokey                | 0.41              | 24        |
| 10.56          | plastic                      | 0.15              | 20        |
| 11.41          | Potato, onion, urinous       | 0.66              | 55        |
| 12.48          | Vinegar, popcorn, potato     | 0.53              | 60        |
| 13.18          | Chemical, unpleasant         | 1.16              | 50        |
| 14.36          | Vinegar, nutty               | 0.43              | 75        |
| 14.97          | Mushroom, earthy, plastic    | 0.30              | 65        |
| 16.02          | Soil, foul, acidic           | 0.29              | 70        |
| 16.9           | Unpleasant, plastic          | 0.29              | 67        |
| 17.69          | Unpleasant                   | 0.17              | 39        |
| 17.89          | Plastic, chemical, dirt      | 0.39              | 70        |
| 18.54          | Unpleasant                   | 0.1               | 21        |
| 19.13          | Unpleasant                   | 0.11              | 25        |
| 19.39          | Popcorn, medicinal, chemical | 0.59              | 20        |
| 20.69          | Chemical                     | 1.49              | 55        |
| 22.29          | Unpleasant, burnt, plastic   | 0.91              | 45        |
| 23.88          | Foul, gas                    | 1.72              | 75        |
| 25.78          | Animal, foul, burnt          | 1.82              | 50        |
| 27.73          | Animal, barnyard             | 0.92              | 50        |
| 29.4           | Animal, foul, chemical       | 0.88              | 65        |
| 30.66          | Animal, foul                 | 0.55              | 40        |
| 31.46          | Chemical, burnt, plastic     | 0.47              | 55        |
| 32.38          | Dirt, plastic, chemical      | 0.73              | 49        |
| 33.3           | Chemical, animal             | 0.54              | 50        |
| 34.22          | Plastic                      | 0.35              | 30        |
| 34.82          | Unpleasant                   | 0.31              | 20        |
| 35.4           | Plastic                      | 0.49              | 35        |

**Table S6:** Aroma description as recorded by the panelist for stale cat feces, 24 h equilibrium and 50 min extraction

| Retention time | Description                                            | Event width<br>(min) | Intensity |
|----------------|--------------------------------------------------------|----------------------|-----------|
| 2.73           | Foul, fishy                                            | 0.64                 | 61        |
| 4.55           | Sweet, fruity, butter                                  | 0.32                 | 30        |
| 11.51          | Neutral, potato                                        | 0.51                 | 15        |
| 12.51          | Chemical, medicinal, basmati rice, neutral, old cheese | 0.55                 | 51        |
| 13.09          | Rain, mint                                             | 0.48                 | 30        |
| 13.76          | Dirt, foul, old cheese                                 | 0.52                 | 45        |
| 14.30          | Garlic, butter, unpleasant                             | 0.50                 | 45        |
| 14.94          | Sweet                                                  | 0.32                 | 41        |
| 16.00          | Butter, onion, old cheese, grassy, herbaceous, woody   | 0.46                 | 51        |
| 16.77          | Butter, acidic, popcorn                                | 0.71                 | 51        |
| 17.85          | Smokey, burnt, plastic                                 | 0.65                 | 45        |
| 19.34          | Smokey                                                 | 0.14                 | 21        |
| 19.6           | Butter, popcorn                                        | 0.28                 | 25        |
| 20.8           | Neutral, woody                                         | 0.69                 | 25        |
| 21.77          | Medicinal, chemical                                    | 0.16                 | 25        |
| 24.33          | Unpleasant 2, urinous, unpleasant3, animal             | 3.4                  | 75        |
| 28.53          | Animal, unpleasant 2, foul                             | 2.25                 | 55        |
| 31.71          | Unpleasant1, burnt                                     | 1.8                  | 35        |
| 35.3           | Chemical, medicinal                                    | 1.23                 | 20        |
